# Supplementary material
Source: PubMed Central journal article supplement (PMC8763193)
Supplement: ASN.2021040554SupplementaryData.pdf [file ASN.2021040554SupplementaryData.pdf]

## **Supplemental Figure Legends**

### **Supplemental Figure 1. Effect of non-calcium-based phosphate binders on change in serum phosphate**

Forest plot showing the effect of non-calcium-based phosphate binders compared to placebo or no study treatment on serum phosphate (mg/dL) at last measurement

### **Supplemental Figure 2. Effect of non-calcium-based phosphate binders on change in urinary phosphate**

Forest plot showing the effect of non-calcium-based phosphate binders compared to placebo or no study treatment on urinary phosphate at last measurement

(Units for urinary phosphate: \* mg/day; # mmol/L; & mmol/day; % 24hr phosphate:creatinine mg/g; \$ spot urine phosphate:creatinine ratio mg/mg)

### **Supplemental Figure 3a. Effect of non-calcium phosphate binders on change in serum calcium**

Forest plot showing the effect of non-calcium phosphate binders compared to placebo on serum calcium (mg/dL) at last measurement

### **Supplemental Figure 3b. Effect of non-calcium-based phosphate binders on change in serum calcium**

Forest plot showing the effect of non-calcium-based phosphate binders compared to placebo or no study treatment on serum calcium (mg/dL) at last measurement

### **Supplemental Figure 4a. Effect of non-calcium phosphate binders on change in kidney function (estimated glomerular filtration rate)**

Forest plot showing the effect of non-calcium phosphate binders compared to placebo on eGFR (ml/min/1.73<sup>2</sup>) at last measurement

**Supplemental Figure 4b. Effect of non-calcium-based phosphate binders on change in kidney function (estimated glomerular filtration rate)**

Forest plot showing the effect of non-calcium-based phosphate binders compared to placebo or no study treatment on eGFR (ml/min/1.73<sup>2</sup>) at last measurement

**Supplemental Figure 5. Effect of non-calcium-based phosphate binders on change in parathyroid hormone (PTH)**

Forest plot showing the effect of non-calcium-based phosphate binders compared to placebo or no study treatment on PTH (pg/mL) at last measurement

**Supplemental Figure 6a. Effect of non-calcium-based phosphate binders on change in c-terminal fibroblast growth factor-23 (cFGF23)**

Forest plot showing the effect of non-calcium-based phosphate binders compared to placebo or no study treatment on cFGF23 (RU/mL) at last measurement

**Supplemental Figure 6b. Effect of non-calcium-based phosphate binders on change in intact fibroblast growth factor-23 (iFGF23)**

Forest plot showing the effect of non-calcium-based phosphate binders compared to placebo or no study treatment on iFGF23 (pg/mL) at last measurement

**Supplemental Figure 7. Effect of non-calcium-based phosphate binders on change in pulse wave velocity (PWV)**

Forest plot showing the effect of non-calcium-based phosphate binders compared to placebo or no study treatment on PWV (m/s) at last measurement

**Supplemental Figure 8. Effect of non-calcium-based phosphate binders on change in vascular calcification**

Forest plot showing the effect of non-calcium-based phosphate binders compared to placebo or no study treatment on vascular calcification scores at last measurement

**Supplemental Figure 9. Effect of non-calcium-based phosphate binders on mortality**

Forest plot showing the effect of non-calcium-based phosphate binders compared to placebo or no study treatment on mortality

**Supplemental Figure 10. Effect of non-calcium-based phosphate binders on cardiovascular events**

Forest plot showing the effect of non-calcium-based phosphate binders compared to placebo or no study treatment on cardiovascular events

**Supplemental Figure 11a. Effect of non-calcium-based phosphate binders on nausea**

Forest plot showing the effect of non-calcium-based phosphate binders compared to placebo on nausea

**Supplemental Figure 11b. Effect of non-calcium-based phosphate binders on nausea**

Forest plot showing the effect of non-calcium-based phosphate binders compared to placebo or no study treatment on nausea

**Supplemental Figure 12. Effect of non-calcium-based phosphate binders on constipation**

Forest plot showing the effect of non-calcium-based phosphate binders compared to placebo or no study treatment on constipation

**Supplemental Figure 13a. Effect of non-calcium-based phosphate binders on diarrhea**

Forest plot showing the effect of non-calcium-based phosphate binders compared to placebo on diarrhea

**Supplemental Figure 13b. Effect of non-calcium-based phosphate binders on diarrhea**

Forest plot showing the effect of non-calcium-based phosphate binders compared to placebo or no study treatment on diarrhea

**Supplemental Figure 14. Effect of non-calcium phosphate binders on cessation of study medication**

Forest plot showing the effect of non-calcium phosphate binders compared to placebo on cessation of study medication during the trial

## Supplemental Tables

### Supplemental Table 1: Search Strategy

1. (non calcium adj3 phosphate binder\*).mp.
2. (phosphate binder\* not calcium).mp.
3. 1 or 2
4. phosphate binder\*.mp.
5. 4 not 3
6. lanthanum carbonate.mp.
7. Lanthanum/
8. sevelamer hydrochloride.mp. or Sevelamer/
9. ((calcium adj2 magnesium) and binder\*).mp.
10. bixalomer.mp.
11. colestilan.mp.
12. (iron and binder\*).mp.
13. sucroferric oxyhydroxide.mp.
14. ferric citrate.mp.
15. ((aluminium or aluminum) and binder\*).mp.
16. nicotinamide.mp. or Niacinamide/
17. phosphate.mp.
18. 16 and 17
19. 1 or 2 or 6 or 7 or 8 or 9 or 10 or 11 or 12 or 13 or 14 or 15 or 18
20. 4 or 6 or 7 or 8 or 9 or 10 or 11 or 12 or 13 or 14 or 15 or 18
21. exp renal insufficiency, chronic/ or kidney failure, chronic/
22. chronic kidney disease.mp.
23. chronic renal failure.mp.
24. 21 or 22 or 23
25. renal replacement therapy/ or exp renal dialysis/ or hemodiafiltration/ or hemodialysis, home/ or peritoneal dialysis/ or kidney transplantation/
26. renal dialysis.mp.
27. Renal Dialysis/
28. renal transplant\*.mp.
29. renal allograft.mp.
30. exp Dialysis/ or dialysis.mp.
31. (hemodialysis or haemodialysis).mp.
32. 25 or 26 or 27 or 28 or 29 or 30 or 31
33. 20 and 24
34. 33 not 32

Supplemental Table 2: GRADE Summary of Evidence for non-calcium-based phosphate binders vs placebo

| <b>Number of studies<br/>(and participants)</b>                   | <b>Limitations<br/>(Risk of Bias)</b> | <b>Indirectness of<br/>patients,<br/>intervention and<br/>comparator</b> | <b>Inconsistency</b>          | <b>Imprecision</b>        | <b>Other<br/>considerations</b>            | <b>Quality of<br/>evidence</b> |
|-------------------------------------------------------------------|---------------------------------------|--------------------------------------------------------------------------|-------------------------------|---------------------------|--------------------------------------------|--------------------------------|
| <b><i>Serum phosphate (follow-up 3-24 months)</i></b>             |                                       |                                                                          |                               |                           |                                            |                                |
| 12 studies<br>(1280 participants)                                 | Serious<br>limitations                | No serious<br>indirectness                                               | Serious<br>inconsistency      | No serious<br>imprecision | Industry funded trials                     | ⊕⊕OO<br>Low                    |
| <b><i>Urinary phosphate excretion (follow-up 3-24 months)</i></b> |                                       |                                                                          |                               |                           |                                            |                                |
| 8 studies<br>(702 participants)                                   | Serious<br>limitations                | No serious<br>indirectness                                               | Serious<br>inconsistency      | No serious<br>imprecision | Industry funded trials                     | ⊕⊕OO<br>Low                    |
| <b><i>Serum calcium (follow-up 3-24 months)</i></b>               |                                       |                                                                          |                               |                           |                                            |                                |
| 11 studies<br>(1257 participants)                                 | Serious<br>limitations                | No serious<br>indirectness                                               | Very serious<br>inconsistency | No serious<br>imprecision | Industry funded trials                     | ⊕OOO<br>Very low               |
| <b><i>Serum PTH (follow-up 3-24 months)</i></b>                   |                                       |                                                                          |                               |                           |                                            |                                |
| 10 trials<br>(1080 participants)                                  | Serious<br>limitations                | No serious<br>indirectness                                               | Very serious<br>inconsistency | No serious<br>imprecision | Industry funded trials                     | ⊕⊕OO<br>Low                    |
| <b><i>Serum intact FGF23 (follow-up 3-24 months)</i></b>          |                                       |                                                                          |                               |                           |                                            |                                |
| 8 trials<br>(937 participants)                                    | Serious<br>limitations                | No serious<br>indirectness                                               | Very serious<br>inconsistency | Serious<br>imprecision    | Small study bias<br>Industry funded trials | ⊕OOO<br>Very low               |
| <b><i>Serum c-terminal FGF23 (follow-up 3-24 months)</i></b>      |                                       |                                                                          |                               |                           |                                            |                                |
| 6 trials<br>(694 participants)                                    | Serious<br>limitations                | No serious<br>indirectness                                               | Very serious<br>inconsistency | Serious<br>imprecision    | Industry funded trials                     | ⊕OOO<br>Very low               |
| <b><i>eGFR (follow-up 3-24 months)</i></b>                        |                                       |                                                                          |                               |                           |                                            |                                |
| 9 trials<br>(930 participants)                                    | Serious<br>limitations                | No serious<br>indirectness                                               | Serious<br>inconsistency      | No serious<br>imprecision | Industry funded trials                     | ⊕⊕OO<br>Low                    |
| <b><i>Mortality (3-24 months)</i></b>                             |                                       |                                                                          |                               |                           |                                            |                                |

|                                                      |                          |                         |                            |                        |                        |                  |
|------------------------------------------------------|--------------------------|-------------------------|----------------------------|------------------------|------------------------|------------------|
| 13 trials<br>(1479 participants)                     | Serious limitations      | No serious indirectness | Very serious inconsistency | Serious imprecision    | Industry funded trials | ⊕○○○<br>Very low |
| <b><i>Cardiovascular events (3-24 months)</i></b>    |                          |                         |                            |                        |                        |                  |
| 7 trials<br>(873 participants)                       | Serious limitations      | No serious indirectness | Serious inconsistency      | Serious imprecision    | Industry funded trials | ⊕○○○<br>Very low |
| <b><i>Pulse wave velocity (10-24 months)</i></b>     |                          |                         |                            |                        |                        |                  |
| 3 trials<br>(333 participants)                       | Very serious limitations | No serious indirectness | Very serious inconsistency | Serious imprecision    | Industry funded trials | ⊕○○○<br>Very low |
| <b><i>Vascular Calcification (9-24 months)</i></b>   |                          |                         |                            |                        |                        |                  |
| 3 trials<br>(183 participants)                       | Very serious limitations | No serious indirectness | Very serious inconsistency | Serious imprecision    | Industry funded trials | ⊕○○○<br>Very low |
| <b><i>Cessation of medications (3-24 months)</i></b> |                          |                         |                            |                        |                        |                  |
| 10 trials<br>(1086 participants)                     | Serious limitations      | No serious indirectness | Serious inconsistency      | No serious imprecision | Industry funded trials | ⊕⊕○○<br>Low      |
| <b><i>Nausea (3-24 months)</i></b>                   |                          |                         |                            |                        |                        |                  |
| 9 trials<br>(1244 participants)                      | Serious limitations      | No serious indirectness | No serious inconsistency   | No serious imprecision | Industry funded trials | ⊕⊕⊕○<br>Moderate |
| <b><i>Diarrhea (3-12 months)</i></b>                 |                          |                         |                            |                        |                        |                  |
| 8 trials<br>(962 participants)                       | Serious limitations      | No serious indirectness | Serious inconsistency      | No serious imprecision | Industry funded trials | ⊕⊕○○<br>Low      |
| <b><i>Constipation (3-12 months)</i></b>             |                          |                         |                            |                        |                        |                  |
| 8 trials<br>(900 participants)                       | Serious limitations      | No serious indirectness | Serious inconsistency      | No serious imprecision | Industry funded trials | ⊕⊕○○<br>Low      |

**Abbreviations:** eGFR, estimated glomerular filtration rate; FGF23, fibroblast growth factor 23; PTH, parathyroid hormone

Supplemental Table 3: Summary of GRADE findings – Non-calcium-based phosphate binders compared to combined placebo or no study medication

| Outcomes                                               | Illustrative Comparative Outcomes                                                               |                                                     | Relative effect (95% confidence interval) | Number of participants (studies) | Certainty of evidence (GRADE)                            | Comments                                                                                          |
|--------------------------------------------------------|-------------------------------------------------------------------------------------------------|-----------------------------------------------------|-------------------------------------------|----------------------------------|----------------------------------------------------------|---------------------------------------------------------------------------------------------------|
|                                                        | Effect non-calcium-based phosphate binders                                                      | Risk with placebo or no study treatment*            |                                           |                                  |                                                          |                                                                                                   |
| <i>Serum phosphate (mg/dL) (3-24 months)</i>           | The measure of mean serum phosphate was 0.29 mg/dL lower than the placebo group                 | The mean serum phosphate was 4.23 mg/dL             | -0.49 – -0.10                             | 1596 (15)                        | ⊕⊕OO<br>Due to risk of bias and inconsistency            | Considerable heterogeneity (I <sup>2</sup> = 85%)                                                 |
| <i>Urinary phosphate excretion (SMD) (3-24 months)</i> | The measure of mean urinary phosphate excretion was 0.61 standard units lower than with placebo | The mean urinary phosphate was 423.1 standard units | -0.84 – -0.38                             | 964 (10)                         | ⊕⊕OO<br>Due to risk of bias and inconsistency            | Different units of urinary phosphate excretion including ratios added to inconsistency of results |
| <i>Serum PTH (pg/dL) (3-24 months)</i>                 | The measure of mean serum PTH was unchanged in comparison to placebo                            | The mean serum PTH was 125.6 pg/dL                  | -15.47 – 10.55                            | 1319 (14)                        | ⊕⊕OO<br>Due to risk of bias and inconsistency of results | Some inconsistency in results regarding effect on PTH                                             |
| <i>Pulse wave velocity</i>                             | The PWV was unchanged                                                                           | The mean PWV was 10.2 m/s                           | -0.46 – 1.05                              | 507 (5)                          | ⊕OOO<br>Due to risk of bias,                             | 3 studies only able to be analysed, with 2 sets of mean values being identical                    |



|                                                                                  |                                                                                                                               |                                                                          |              |              |                                                            |                                                                                                                                                    |
|----------------------------------------------------------------------------------|-------------------------------------------------------------------------------------------------------------------------------|--------------------------------------------------------------------------|--------------|--------------|------------------------------------------------------------|----------------------------------------------------------------------------------------------------------------------------------------------------|
| <i>(m/s)</i><br><i>(10-24 months)</i>                                            |                                                                                                                               |                                                                          |              |              | imprecision and inconsistency                              | (likely due to transformation of median to mean for analysis)                                                                                      |
| <b>Vascular calcification</b><br><i>(Standard units)</i><br><i>(9-24 months)</i> | There was a small degree of effect on vascular calcification (Hedge's $g=0.29$ )                                              | High background risk of vascular calcification in CKD depending on stage | 0.02 – 0.56  | 320<br>(5)   | ⊕○○○<br>Due to risk of bias, imprecision and inconsistency | Statistically significant ( $p<0.01$ )<br>Not likely to be of clinical significance.<br>3 studies only able to be analysed.                        |
| <b>Mortality</b><br><i>(log OR)</i><br><i>(3-24 months)</i>                      | There was no significant difference in mortality rate between the two groups (log OR -0.22)                                   | Risk with placebo 2/100 person years                                     | -1.41 – 0.97 | 1942<br>(17) | ⊕○○○<br>Due to risk of bias, imprecision and inconsistency | Large confidence intervals leading to imprecision.<br>Studies often not powered or had long enough follow-up geared to considerations of mortality |
| <b>Cardiovascular events</b><br><i>(log OR)</i><br><i>(3-24 months)</i>          | There was no difference in the risk of cardiovascular events between non-calcium binders and no study treatment (log OR 0.15) | Not estimable                                                            | -0.58 – 0.88 | 1072<br>(8)  | ⊕○○○<br>Due to risk of bias, imprecision and inconsistency | Few events and not powered for follow-up                                                                                                           |

\* Calculations for overall weighted means for serum and urinary phosphate, PTH and PWV – sum of weighted placebo means across studies for each variable.

Supplemental Table 4: GRADE Summary of Evidence for non-calcium phosphate binders vs placebo or no study treatment

| <b>Number of studies<br/>(and participants)</b>                   | <b>Limitations<br/>(Risk of Bias)</b> | <b>Indirectness of<br/>patients,<br/>intervention and<br/>comparator</b> | <b>Inconsistency</b>          | <b>Imprecision</b>        | <b>Other<br/>considerations</b>            | <b>Quality of<br/>evidence</b> |
|-------------------------------------------------------------------|---------------------------------------|--------------------------------------------------------------------------|-------------------------------|---------------------------|--------------------------------------------|--------------------------------|
| <b><i>Serum phosphate (follow-up 3-24 months)</i></b>             |                                       |                                                                          |                               |                           |                                            |                                |
| 15 studies<br>(1596 participants)                                 | Serious<br>limitations                | No serious<br>indirectness                                               | Serious<br>inconsistency      | No serious<br>imprecision | Industry funded trials                     | ⊕⊕OO<br>Low                    |
| <b><i>Urinary phosphate excretion (follow-up 3-24 months)</i></b> |                                       |                                                                          |                               |                           |                                            |                                |
| 10 studies<br>(964 participants)                                  | Serious<br>limitations                | No serious<br>indirectness                                               | Serious<br>inconsistency      | No serious<br>imprecision | Industry funded trials                     | ⊕⊕OO<br>Low                    |
| <b><i>Serum calcium (follow-up 3-24 months)</i></b>               |                                       |                                                                          |                               |                           |                                            |                                |
| 13 studies<br>(1519 participants)                                 | Serious<br>limitations                | No serious<br>indirectness                                               | Very serious<br>inconsistency | No serious<br>imprecision | Industry funded trials                     | ⊕OOO<br>Very low               |
| <b><i>Serum PTH (follow-up 3-24 months)</i></b>                   |                                       |                                                                          |                               |                           |                                            |                                |
| 14 trials<br>(1319 participants)                                  | Serious<br>limitations                | No serious<br>indirectness                                               | Very serious<br>inconsistency | No serious<br>imprecision | Industry funded trials                     | ⊕⊕OO<br>Low                    |
| <b><i>Serum intact FGF23 (follow-up 3-24 months)</i></b>          |                                       |                                                                          |                               |                           |                                            |                                |
| 12 trials<br>(1224 participants)                                  | Serious<br>limitations                | No serious<br>indirectness                                               | Very serious<br>inconsistency | Serious<br>imprecision    | Small study bias<br>Industry funded trials | ⊕OOO<br>Very low               |
| <b><i>Serum c-terminal FGF23 (follow-up 3-24 months)</i></b>      |                                       |                                                                          |                               |                           |                                            |                                |
| 7 trials<br>(854 participants)                                    | Serious<br>limitations                | No serious<br>indirectness                                               | Very serious<br>inconsistency | Serious<br>imprecision    | Industry funded trials                     | ⊕OOO<br>Very low               |
| <b><i>eGFR (follow-up 3-24 months)</i></b>                        |                                       |                                                                          |                               |                           |                                            |                                |
| 12 trials<br>(1191 participants)                                  | Serious<br>limitations                | No serious<br>indirectness                                               | Serious<br>inconsistency      | No serious<br>imprecision | Industry funded trials                     | ⊕⊕OO<br>Low                    |
| <b><i>Mortality (3-24 months)</i></b>                             |                                       |                                                                          |                               |                           |                                            |                                |

|                                                      |                          |                         |                            |                        |                        |                  |
|------------------------------------------------------|--------------------------|-------------------------|----------------------------|------------------------|------------------------|------------------|
| 17 trials<br>(1942 participants)                     | Serious limitations      | No serious indirectness | Very serious inconsistency | Serious imprecision    | Industry funded trials | ⊕○○○<br>Very low |
| <b><i>Cardiovascular events (3-24 months)</i></b>    |                          |                         |                            |                        |                        |                  |
| 8 trials<br>(1072 participants)                      | Serious limitations      | No serious indirectness | Serious inconsistency      | Serious imprecision    | Industry funded trials | ⊕○○○<br>Very low |
| <b><i>Pulse wave velocity (10-24months)</i></b>      |                          |                         |                            |                        |                        |                  |
| 5 trials<br>(507 participants)                       | Very serious limitations | No serious indirectness | Serious inconsistency      | Serious imprecision    | Industry funded trials | ⊕⊕○○<br>Very low |
| <b><i>Vascular calcification (9-24 months)</i></b>   |                          |                         |                            |                        |                        |                  |
| 5 trials<br>(320 participants)                       | Very serious limitations | No serious indirectness | Serious inconsistency      | Serious imprecision    | Industry funded trials | ⊕○○○<br>Very low |
| <b><i>Cessation of medications (3-24 months)</i></b> |                          |                         |                            |                        |                        |                  |
| 10 trials<br>(1086 participants)                     | Serious limitations      | No serious indirectness | Serious inconsistency      | No serious imprecision | Industry funded trials | ⊕○○○<br>Very low |
| <b><i>Nausea (3-24 months)</i></b>                   |                          |                         |                            |                        |                        |                  |
| 10 trials<br>(1350 participants)                     | Serious limitations      | No serious indirectness | No serious inconsistency   | No serious imprecision | Industry funded trials | ⊕⊕⊕○<br>Moderate |
| <b><i>Diarrhea (3-12 months)</i></b>                 |                          |                         |                            |                        |                        |                  |
| 8 trials<br>(962 participants)                       | Serious limitations      | No serious indirectness | Serious inconsistency      | No serious imprecision | Industry funded trials | ⊕⊕○○<br>Low      |
| <b><i>Constipation (3-12 months)</i></b>             |                          |                         |                            |                        |                        |                  |
| 9 trials<br>(1006 participants)                      | Serious limitations      | No serious indirectness | Serious inconsistency      | No serious imprecision | Industry funded trials | ⊕⊕○○<br>Low      |

**Abbreviations:** eGFR, estimated glomerular filtration rate; FGF23, fibroblast growth factor 23; PTH, parathyroid hormone

Supplemental Table 5: Summary of GRADE findings – Non-calcium phosphate-lowering therapy compared to placebo

| Outcomes                                                  | Illustrative Comparative Outcomes                                              |                                                     | Relative effect (95% confidence interval) | Number of participants (studies) | Quality of evidence (GRADE)                              | Comments                                                                                                                  |
|-----------------------------------------------------------|--------------------------------------------------------------------------------|-----------------------------------------------------|-------------------------------------------|----------------------------------|----------------------------------------------------------|---------------------------------------------------------------------------------------------------------------------------|
|                                                           | <b>Effect of non-calcium phosphate-lowering therapy</b>                        | <b>Risk with placebo*</b>                           |                                           |                                  |                                                          |                                                                                                                           |
| <i>Serum phosphate (mg/dL)</i><br>(3-24 months)           | The measure of mean serum phosphate was 0.3 mg/dL lower than the placebo group | The mean serum phosphate was 4.28 mg/dL             | -0.55 – -0.14                             | 1330 (12)                        | ⊕⊕⊕⊕<br>Due to risk of bias and inconsistency            | Considerable heterogeneity (I <sup>2</sup> = 85%)                                                                         |
| <i>Urinary phosphate excretion (SMD)</i><br>(3-24 months) | The measure of mean urinary phosphate excretion was 0.55 standard units lower. | The mean urinary phosphate was 432.5 standard units | -0.83 – -0.27                             | 753 (8)                          | ⊕⊕⊕⊕<br>Due to risk of bias and inconsistency            | Different units of urinary phosphate excretion including ratios added to inconsistency of results (I <sup>2</sup> =68.3%) |
| <i>Serum PTH (pg/dL)</i><br>(3-24 months)                 | The measure of mean serum PTH was unchanged                                    | The mean serum PTH was 130.5 pg/dL                  | -20.21 – 7.16                             | 1131 (11)                        | ⊕⊕⊕⊕<br>Due to risk of bias and inconsistency of results | Some inconsistency in results regarding effect on PTH (I <sup>2</sup> =69% with large confidence intervals)               |
| <i>Vascular calcification</i>                             | There was a suggestion of a moderate                                           | High background risk of                             | 0.17 – 0.77                               | 320 (3)                          | ⊕⊕⊕⊕<br>Due to risk of bias,                             | Two studies only with a small number of participants                                                                      |

|                                                                     |                                                                                             |                                                  |              |             |                                                                 |                                                                                                                                                 |
|---------------------------------------------------------------------|---------------------------------------------------------------------------------------------|--------------------------------------------------|--------------|-------------|-----------------------------------------------------------------|-------------------------------------------------------------------------------------------------------------------------------------------------|
| <i>(Standard units)</i><br><i>(9-24 months)</i>                     | increase in vascular calcification with phosphate-lowering medication (Hedge's $g=0.47$ )   | vascular calcification in CKD depending on stage |              |             | imprecision and inconsistency                                   |                                                                                                                                                 |
| <i>Pulse wave velocity</i><br><i>(m/s)</i><br><i>(10-24 months)</i> | There was no difference in pulse wave velocity with phosphate lowering medication           | The mean PWV in the placebo group was 10.4m/s    | -0.46 – 1.05 | 333<br>(3)  | ⊕○○○<br>Due to some risk of bias, imprecision and inconsistency | Three studies only                                                                                                                              |
| <i>Mortality</i><br><i>(log OR)</i><br><i>(3-24 months)</i>         | There was no significant difference in mortality risk between the two groups (log OR -0.56) | Risk with placebo 2/100 person years             | -1.99 – 0.87 | 1530<br>(8) | ⊕○○○<br>Due to risk of bias, imprecision and inconsistency      | Large confidence intervals leading to imprecision. Studies often not powered or had long enough follow-up geared to considerations of mortality |
| <i>Cardiovascular events</i><br><i>(3-24 months)</i>                | There was no significant difference in the cardiovascular event risk between the two groups | Not estimable                                    |              | 873<br>(7)  | ⊕○○○<br>Due to risk of bias, imprecision and inconsistency      |                                                                                                                                                 |

\* Calculations for overall weighted means for serum and urinary phosphate, PTH and PWV – sum of weighted placebo means across studies for each variable

Supplemental Table 6: GRADE Summary of Evidence for non-calcium phosphate-lowering therapy vs placebo

| <b>Number of studies<br/>(and participants)</b>                   | <b>Limitations<br/>(Risk of Bias)</b> | <b>Indirectness of<br/>patients,<br/>intervention and<br/>comparator</b> | <b>Inconsistency</b>          | <b>Imprecision</b>        | <b>Other<br/>considerations</b>            | <b>Quality of<br/>evidence</b> |
|-------------------------------------------------------------------|---------------------------------------|--------------------------------------------------------------------------|-------------------------------|---------------------------|--------------------------------------------|--------------------------------|
| <b><i>Serum phosphate (follow-up 3-24 months)</i></b>             |                                       |                                                                          |                               |                           |                                            |                                |
| 12 studies<br>(1330 participants)                                 | Serious<br>limitations                | No serious<br>indirectness                                               | Serious<br>inconsistency      | No serious<br>imprecision | Industry funded trials                     | ⊕⊕OO<br>Low                    |
| <b><i>Urinary phosphate excretion (follow-up 3-24 months)</i></b> |                                       |                                                                          |                               |                           |                                            |                                |
| 8 studies<br>(753 participants)                                   | Serious<br>limitations                | No serious<br>indirectness                                               | Serious<br>inconsistency      | No serious<br>imprecision | Industry funded trials                     | ⊕⊕OO<br>Low                    |
| <b><i>Serum calcium (follow-up 3-24 months)</i></b>               |                                       |                                                                          |                               |                           |                                            |                                |
| 11 studies<br>(1308 participants)                                 | Serious<br>limitations                | No serious<br>indirectness                                               | Very serious<br>inconsistency | No serious<br>imprecision | Industry funded trials                     | ⊕OOO<br>Very low               |
| <b><i>Serum PTH (follow-up 3-24 months)</i></b>                   |                                       |                                                                          |                               |                           |                                            |                                |
| 11 trials<br>(1131 participants)                                  | Serious<br>limitations                | No serious<br>indirectness                                               | Very serious<br>inconsistency | No serious<br>imprecision | Industry funded trials                     | ⊕⊕OO<br>Low                    |
| <b><i>Serum intact FGF23 (follow-up 3-24 months)</i></b>          |                                       |                                                                          |                               |                           |                                            |                                |
| 9 trials<br>(988 participants)                                    | Serious<br>limitations                | No serious<br>indirectness                                               | Very serious<br>inconsistency | Serious<br>imprecision    | Small study bias<br>Industry funded trials | ⊕OOO<br>Very low               |
| <b><i>Serum c-terminal FGF23 (follow-up 3-24 months)</i></b>      |                                       |                                                                          |                               |                           |                                            |                                |
| 6 trials<br>(694 participants)                                    | Serious<br>limitations                | No serious<br>indirectness                                               | Very serious<br>inconsistency | Serious<br>imprecision    | Industry funded trials                     | ⊕OOO<br>Very low               |
| <b><i>eGFR (follow-up 3-24 months)</i></b>                        |                                       |                                                                          |                               |                           |                                            |                                |
| 9 trials<br>(981 participants)                                    | Serious<br>limitations                | No serious<br>indirectness                                               | Serious<br>inconsistency      | No serious<br>imprecision | Industry funded trials                     | ⊕⊕OO<br>Low                    |
| <b><i>Mortality (3-24 months)</i></b>                             |                                       |                                                                          |                               |                           |                                            |                                |

|                                                      |                          |                         |                            |                        |                        |                  |
|------------------------------------------------------|--------------------------|-------------------------|----------------------------|------------------------|------------------------|------------------|
| 13 trials<br>(1530 participants)                     | Serious limitations      | No serious indirectness | Very serious inconsistency | Serious imprecision    | Industry funded trials | ⊕○○○<br>Very low |
| <b><i>Cardiovascular events (3-24 months)</i></b>    |                          |                         |                            |                        |                        |                  |
| 7 trials<br>(873 participants)                       | Serious limitations      | No serious indirectness | Serious inconsistency      | Serious imprecision    | Industry funded trials | ⊕○○○<br>Very low |
| <b><i>Pulse wave velocity (10-24 months)</i></b>     |                          |                         |                            |                        |                        |                  |
| 3 trials<br>(333 participants)                       | Very serious limitations | No serious indirectness | Serious inconsistency      | Serious imprecision    | Industry funded trials | ⊕○○○<br>Very low |
| <b><i>Vascular calcification (9-24 months)</i></b>   |                          |                         |                            |                        |                        |                  |
| 3 trials<br>(320 participants)                       | Very serious limitations | No serious indirectness | Very serious inconsistency | Serious imprecision    | Industry funded trials | ⊕○○○<br>Very low |
| <b><i>Cessation of medications (3-24 months)</i></b> |                          |                         |                            |                        |                        |                  |
| 10 trials<br>(1086 participants)                     | Serious limitations      | No serious indirectness | Serious inconsistency      | No serious imprecision | Industry funded trials | ⊕⊕○○<br>Low      |
| <b><i>Nausea (3-24 months)</i></b>                   |                          |                         |                            |                        |                        |                  |
| 9 trials<br>(1295 participants)                      | Serious limitations      | No serious indirectness | No serious inconsistency   | No serious imprecision | Industry funded trials | ⊕⊕⊕○<br>Moderate |
| <b><i>Diarrhea</i></b>                               |                          |                         |                            |                        |                        |                  |
| 8 trials<br>(936 participants)                       | Serious limitations      | No serious indirectness | Very serious inconsistency | No serious imprecision | Industry funded trials | ⊕○○○<br>Very low |
| <b><i>Constipation</i></b>                           |                          |                         |                            |                        |                        |                  |
| 8 trials<br>(900 participants)                       | Serious limitations      | No serious indirectness | Very serious inconsistency | No serious imprecision | Industry funded trials | ⊕○○○<br>Very low |

**Abbreviations:** eGFR, estimated glomerular filtration rate; FGF23, fibroblast growth factor 23; PTH, parathyroid hormone

Supplemental Table 7: Summary of GRADE findings – Non-calcium-based phosphate binders compared to calcium-based phosphate binders<sup>#</sup>

| Outcomes                                               | Illustrative Comparative Outcomes                                                                |                                                     | Relative effect (95% confidence interval) | Number of participants (studies <sup>&amp;</sup> ) | Certainty of evidence (GRADE)                                   | Comments                                                                                                                                                          |
|--------------------------------------------------------|--------------------------------------------------------------------------------------------------|-----------------------------------------------------|-------------------------------------------|----------------------------------------------------|-----------------------------------------------------------------|-------------------------------------------------------------------------------------------------------------------------------------------------------------------|
|                                                        | Effect of non-calcium-based phosphate binders                                                    | Risk with calcium-based phosphate binders*          |                                           |                                                    |                                                                 |                                                                                                                                                                   |
| <i>Serum phosphate (mg/dL) (4-36 months)</i>           | The measure of mean serum phosphate was not lower with non-calcium phosphate binders             | The mean serum phosphate was 4.47 mg/dL             | -0.35 – 0.22                              | 436 (5)                                            | ⊕○○○<br>Due to high risk of bias and very serious inconsistency | Considerable heterogeneity (I <sup>2</sup> =79%)                                                                                                                  |
| <i>Urinary phosphate excretion (SMD) (4-24 months)</i> | The measure of mean urinary phosphate excretion was not lower with non-calcium phosphate binders | The mean urinary phosphate was 380.8 standard units | -3.17 – -1.00                             | 152 (3)                                            | ⊕○○○<br>Due to high risk of bias and very serious inconsistency | Different units of urinary phosphate excretion including ratios added to inconsistency of results. Considerable heterogeneity (I <sup>2</sup> = 97%)              |
| <i>Serum calcium (mg/dL) (4-36 months)</i>             | The measure of mean serum calcium was not higher with non-calcium phosphate binders              | The mean serum calcium was 9.42 mg/dL               | -0.70 – 0.15                              | 436 (5)                                            | ⊕○○○<br>Due to high risk of bias and very serious inconsistency | Very serious inconsistency in results regarding effect on non-calcium-based phosphate binders on serum calcium. Considerable heterogeneity (I <sup>2</sup> = 96%) |



|                                                                                                       |                                                                                                                      |                                                                          |                |             |                                                                 |                                                                                            |
|-------------------------------------------------------------------------------------------------------|----------------------------------------------------------------------------------------------------------------------|--------------------------------------------------------------------------|----------------|-------------|-----------------------------------------------------------------|--------------------------------------------------------------------------------------------|
| <b><i>Serum PTH</i></b><br><b><i>(pg/dL)</i></b><br><b><i>(4-36 months)</i></b>                       | The measure of mean serum PTH was unchanged                                                                          | The mean serum PTH was 212.2 pg/dL                                       | -17.58 – 10.97 | 1131<br>(5) | ⊕○○○<br>Due to high risk of bias and inconsistency of results   | Some inconsistency in results regarding effect on PTH                                      |
| <b><i>Mortality</i></b><br><b><i>(log OR)</i></b><br><b><i>(4-36 months)</i></b>                      | There was no significant difference in mortality rate between non-calcium binders and calcium binders (log OR -0.70) | Risk with placebo 2/100 person years                                     | -1.45 – 0.05   | 421<br>(4)  | ⊕○○○<br>Due to high risk of bias, imprecision and inconsistency | Large confidence intervals, with only one large trial leading to any events being recorded |
| <b><i>Vascular calcification</i></b><br><b><i>(Standard units)</i></b><br><b><i>(9-24 months)</i></b> | There was no apparent difference in vascular calcification with non-calcium or calcium phosphate binders (0.05)      | High background risk of vascular calcification in CKD depending on stage | -0.43 – 0.53   | 120<br>(2)  | ⊕○○○<br>Due to risk of bias, imprecision and inconsistency      | Two studies only with a small number of participants                                       |

# The majority for studies had risk of bias for allocation concealment and performance bias  
& The calcium-based binder arm of *Block (2012)* included

\* Calculations for overall weighted means for serum and urinary phosphate, calcium, PTH and PWV – sum of weighted placebo means across studies for each variable

Supplemental Table 8: GRADE Summary of Evidence for non-calcium-based phosphate binders vs calcium-based phosphate binders

| <i>Number of studies<br/>(and participants)</i>                   | <i>Limitations<br/>(Risk of<br/>Bias)</i> | <i>Indirectness of<br/>patients,<br/>intervention and<br/>comparator</i> | <i>Inconsistency</i>          | <i>Imprecision</i>        | <i>Other considerations</i> | <i>Quality of<br/>evidence</i> |
|-------------------------------------------------------------------|-------------------------------------------|--------------------------------------------------------------------------|-------------------------------|---------------------------|-----------------------------|--------------------------------|
| <b><i>Serum phosphate (follow-up 4-36 months)</i></b>             |                                           |                                                                          |                               |                           |                             |                                |
| 5 studies<br>(436 participants)                                   | Very serious<br>limitations               | No serious<br>indirectness                                               | Very serious<br>inconsistency | No serious<br>imprecision | Industry funded trials      | ⊕○○○<br>Very low               |
| <b><i>Urinary phosphate excretion (follow-up 4-24 months)</i></b> |                                           |                                                                          |                               |                           |                             |                                |
| 3 studies<br>(152 participants)                                   | Very serious<br>limitations               | No serious<br>indirectness                                               | Very serious<br>inconsistency | No serious<br>imprecision | Industry funded trials      | ⊕○○○<br>Very low               |
| <b><i>Serum calcium (follow-up 4-24 months)</i></b>               |                                           |                                                                          |                               |                           |                             |                                |
| 5 studies<br>(436 participants)                                   | Very serious<br>limitations               | No serious<br>indirectness                                               | Very serious<br>inconsistency | No serious<br>imprecision | Industry funded trials      | ⊕○○○<br>Very low               |
| <b><i>Serum PTH (follow-up 4-24 months)</i></b>                   |                                           |                                                                          |                               |                           |                             |                                |
| 5 trials<br>(1131 participants)                                   | Very serious<br>limitations               | No serious<br>indirectness                                               | Very serious<br>inconsistency | No serious<br>imprecision | Industry funded trials      | ⊕○○○<br>Very low               |
| <b><i>eGFR (follow-up 3-24 months)</i></b>                        |                                           |                                                                          |                               |                           |                             |                                |
| 3 trials<br>(152 participants)                                    | Very serious<br>limitations               | No serious<br>indirectness                                               | Serious<br>inconsistency      | No serious<br>imprecision | Industry funded trials      | ⊕○○○<br>Very low               |
| <b><i>Mortality (4-24 months)</i></b>                             |                                           |                                                                          |                               |                           |                             |                                |
| 4 trials<br>(421 participants)                                    | Very serious<br>limitations               | No serious<br>indirectness                                               | Very serious<br>inconsistency | Serious<br>imprecision    | Industry funded trials      | ⊕○○○<br>Very low               |
| <b><i>Vascular calcification (9-24 months)</i></b>                |                                           |                                                                          |                               |                           |                             |                                |
| 2 trials<br>(120 participants)                                    | Very serious<br>limitations               | No serious<br>indirectness                                               | Serious<br>inconsistency      | Serious<br>imprecision    | Industry funded trials      | ⊕○○○<br>Very low               |

**Abbreviations:** eGFR, estimated glomerular filtration rate; PTH, parathyroid hormone

## Supplemental Figures

Supplemental Figure 1: Effect of non-calcium-based phosphate binders compared to placebo or no study treatment on serum phosphate.

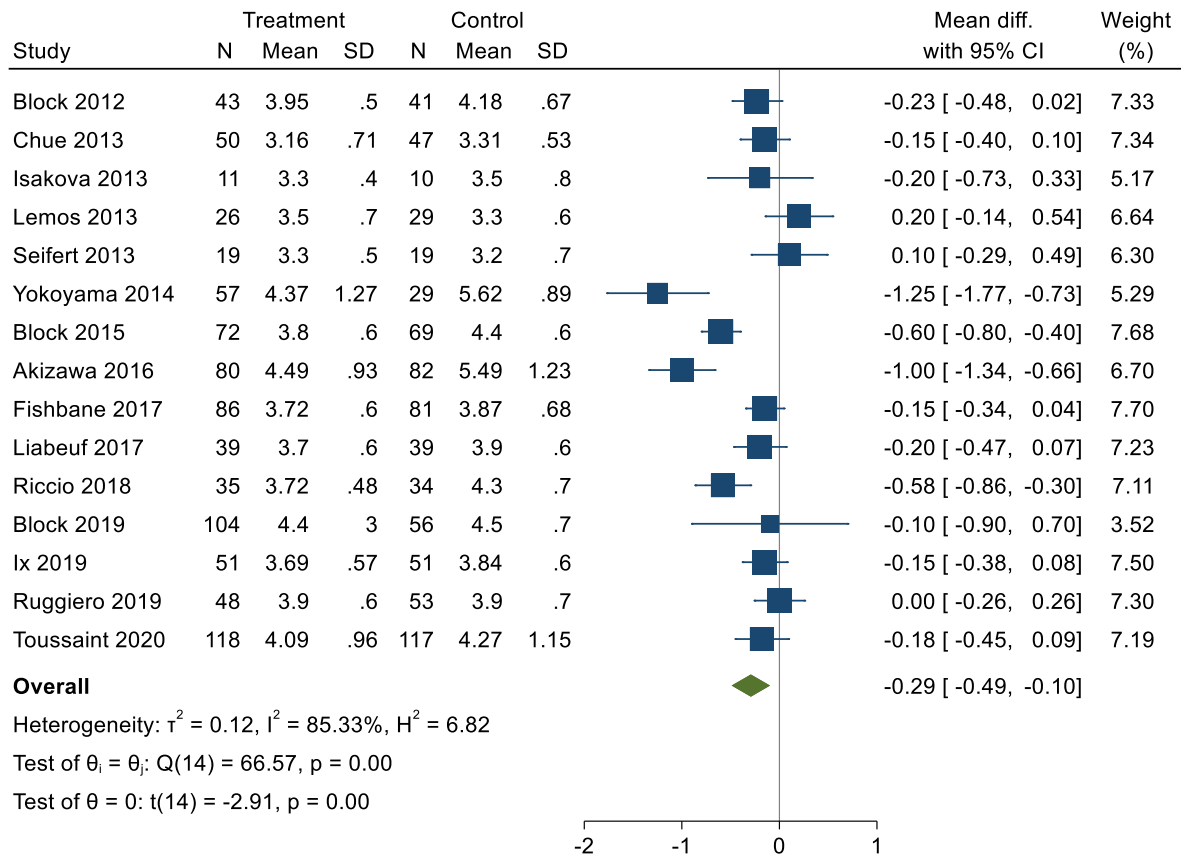

Random-effects Sidik-Jonkman model

Supplemental Figure 2: Effect of non-calcium phosphate binders compared to placebo or no study treatment on urinary phosphate.

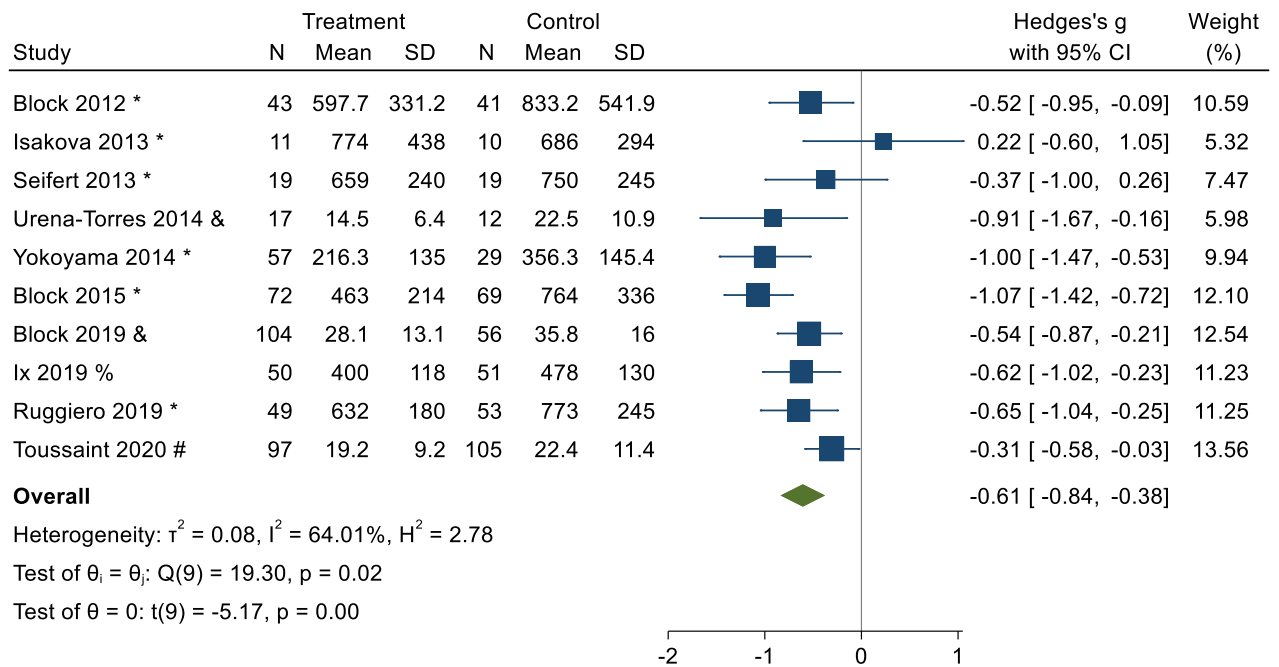

Random-effects Sidik-Jonkman model

Supplemental Figure 3a: Effect of non-calcium phosphate binder compared to placebo on serum calcium.

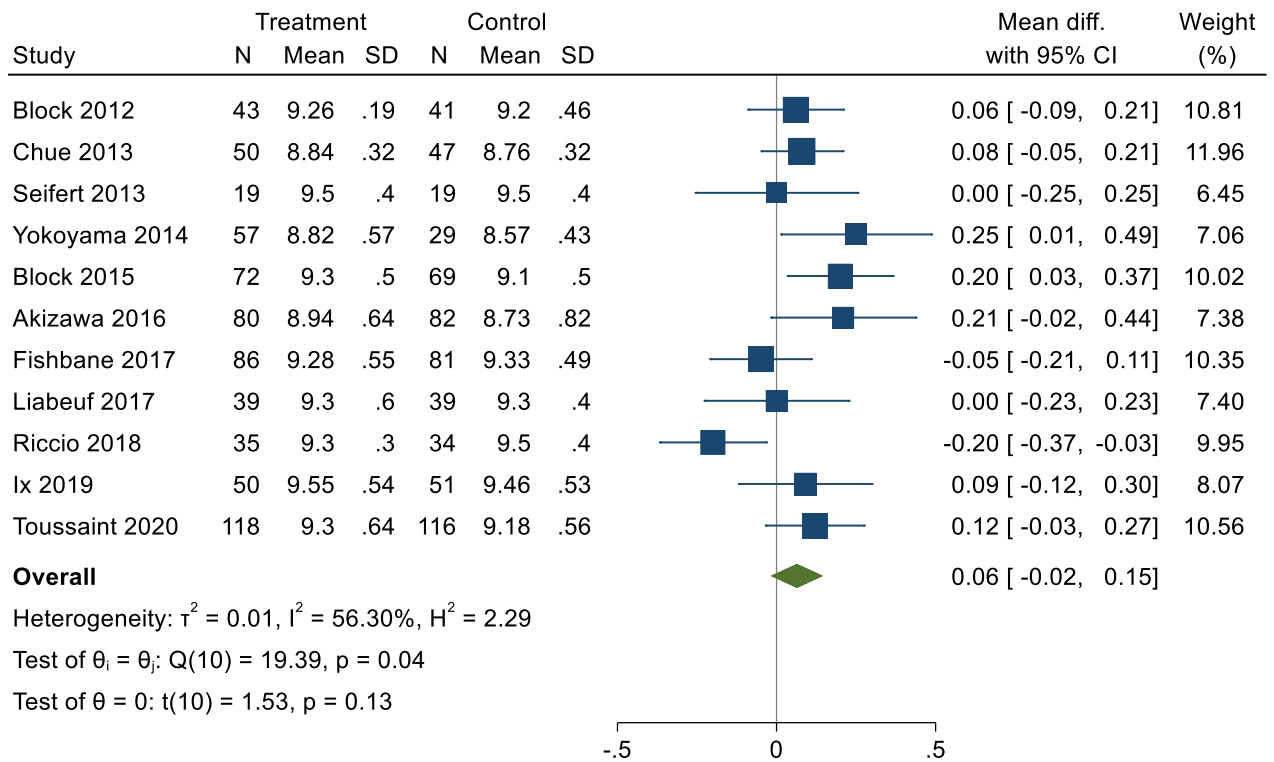

Random-effects Sidik-Jonkman model

Supplemental Figure 3b: Effect of non-calcium phosphate binders compared to placebo or no study treatment on serum calcium.

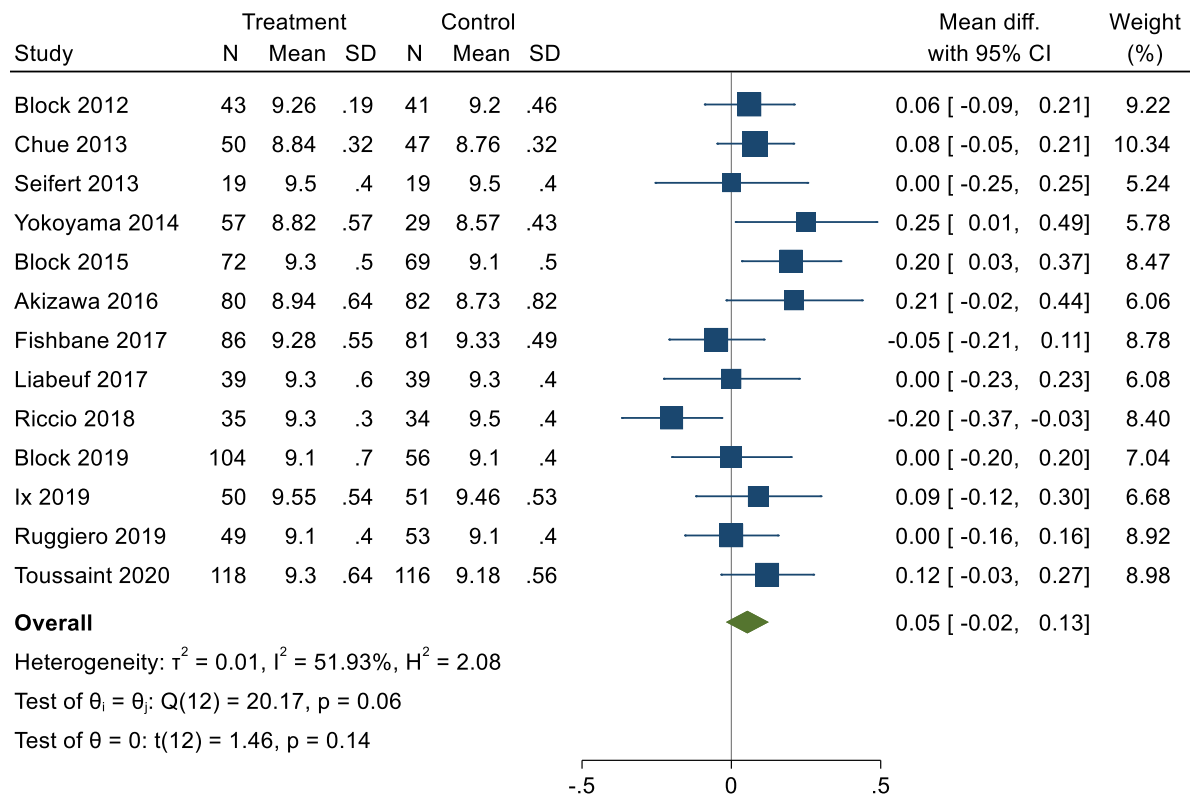

Random-effects Sidik-Jonkman model

Supplemental Figure 4a: Effect of non-calcium phosphate binders compared to placebo on eGFR.

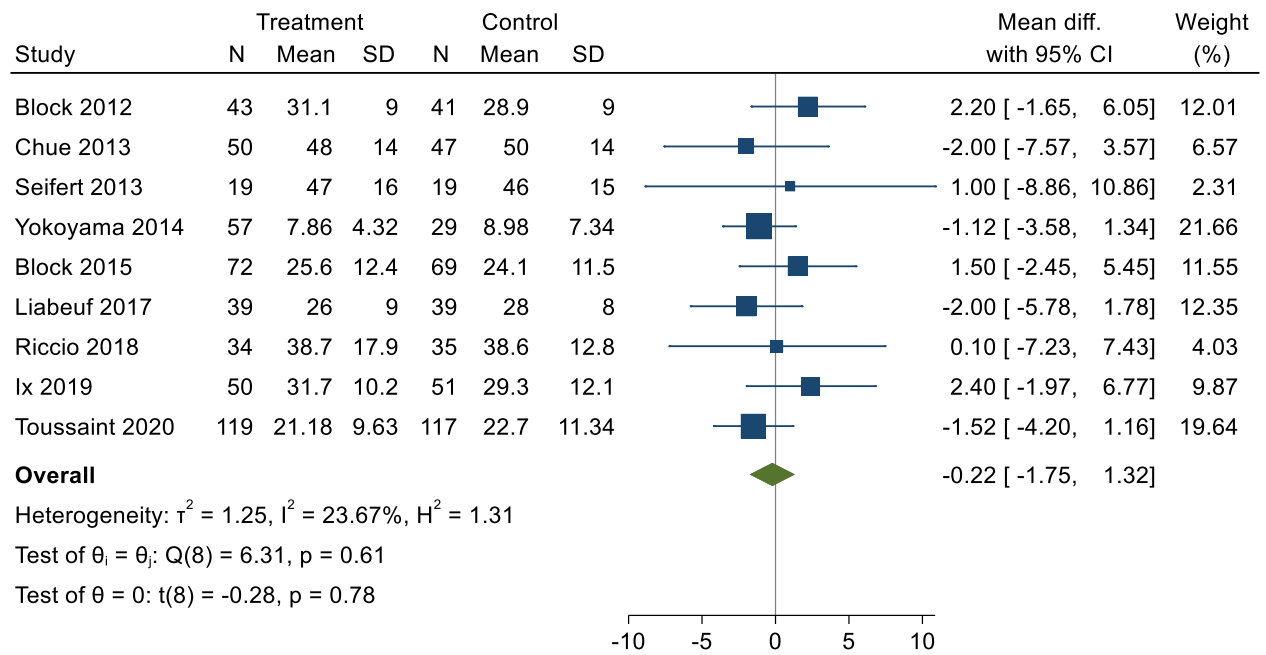

Random-effects Sidik-Jonkman model

Supplemental Figure 4b: Effect of non-calcium-based phosphate binders compared to placebo or no study treatment on eGFR.

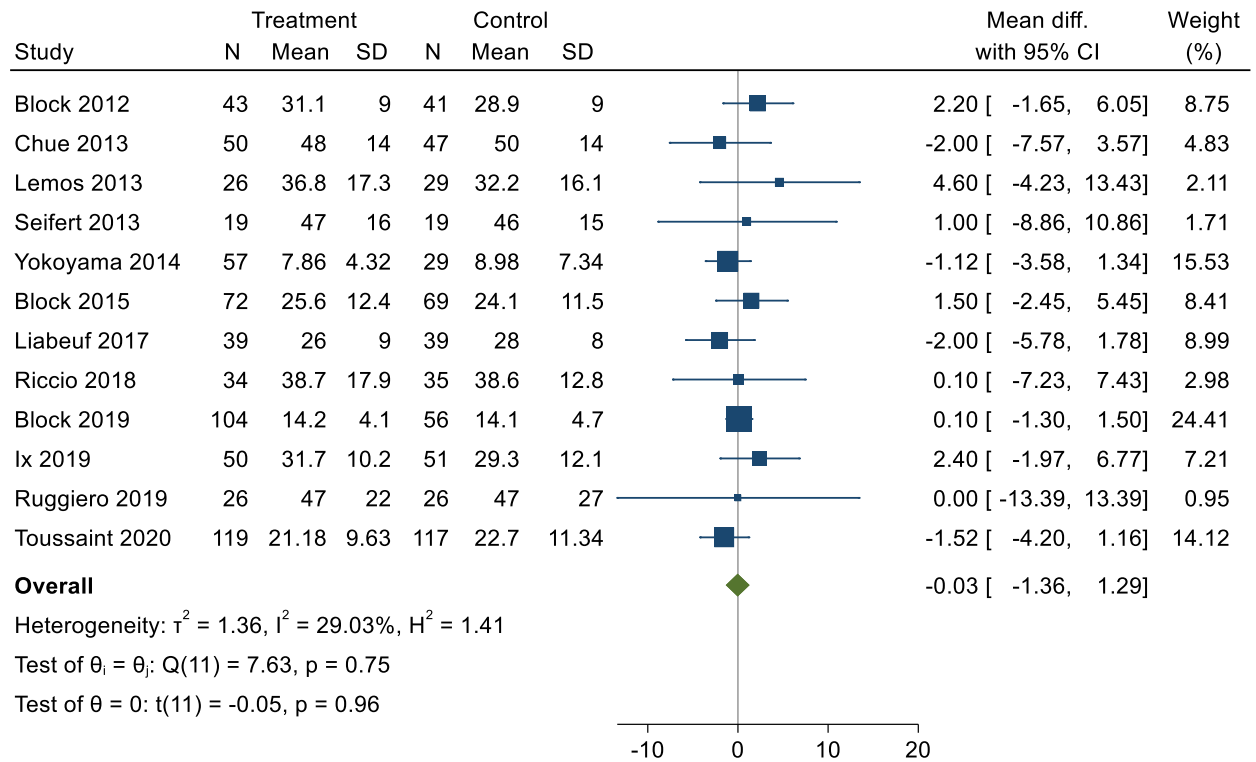

Random-effects Sidik-Jonkman model



**Supplemental Figure 5: Effect of non-calcium-based phosphate binders compared to placebo or no study treatment on PTH.**

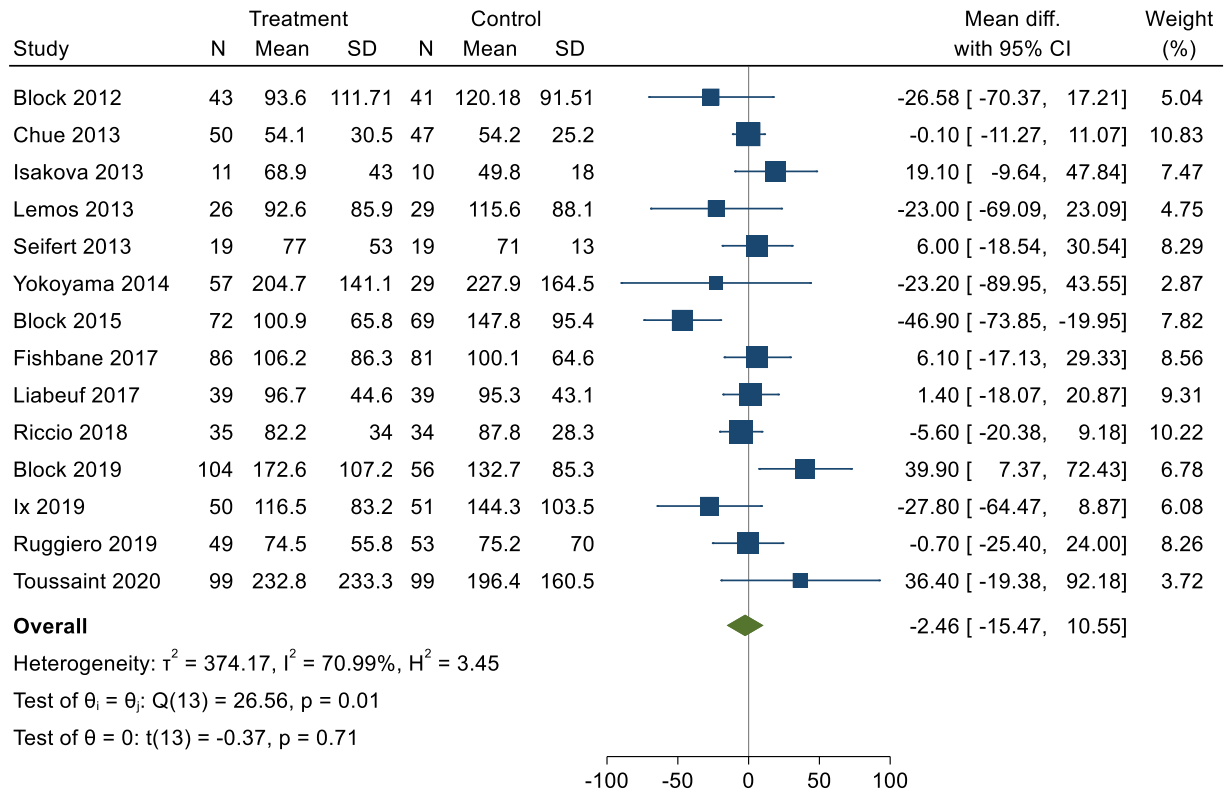

Random-effects Sidik-Jonkman model

Supplemental Figure 6a: Effect of non-calcium-based phosphate binders compared to placebo or no study treatment on cFGF23.

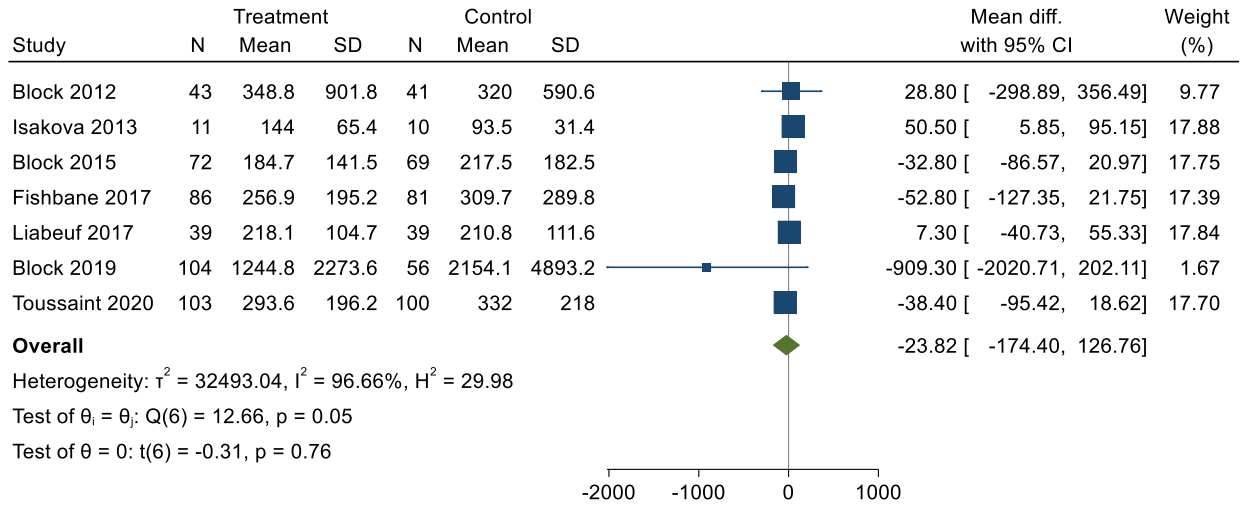

Random-effects Sidik-Jonkman model

Supplemental Figure 6b: Effect of non-calcium-based phosphate binders compared to placebo or no study treatment on iFGF23.

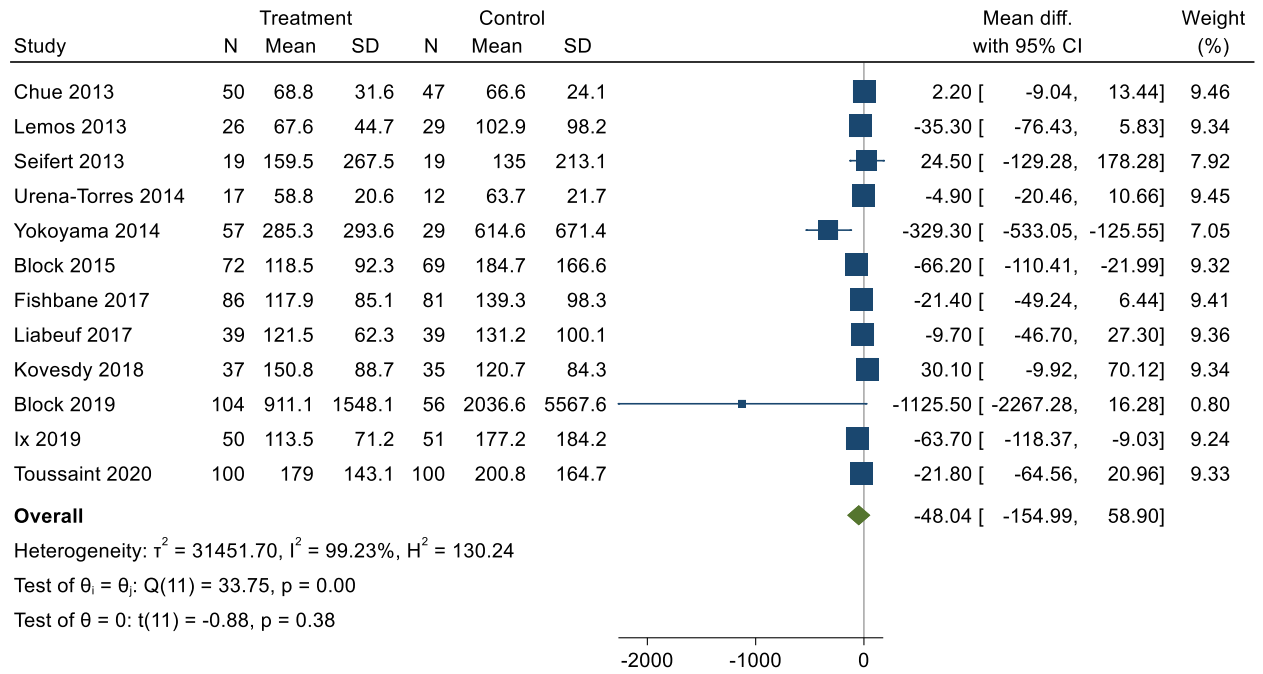

Random-effects Sidik-Jonkman model

**Supplemental Figure 7: Effect of non-calcium-based phosphate binders compared to placebo or no study treatment on PWV.**

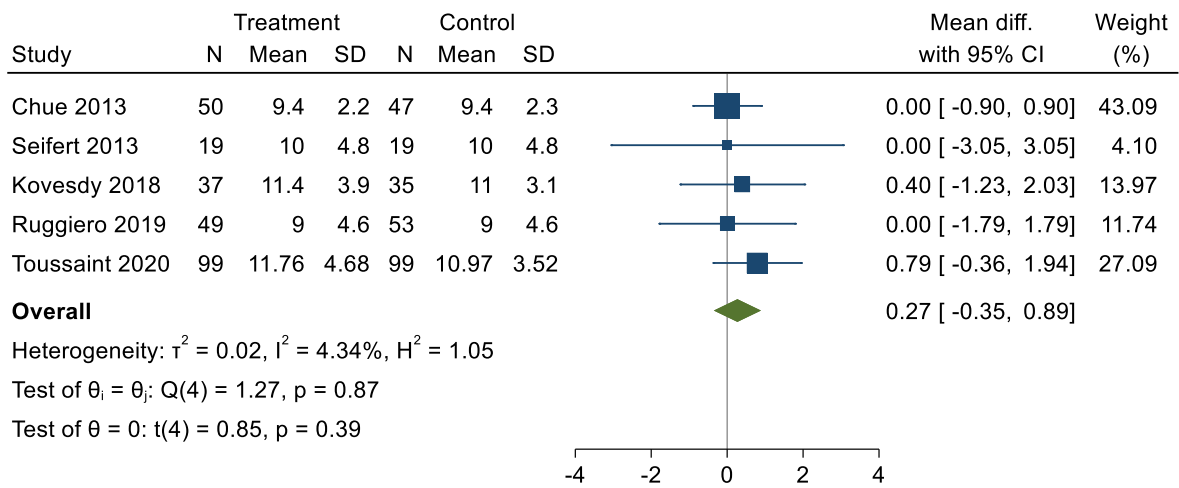

Random-effects Sidik-Jonkman model

**Supplemental Figure 8: Effect of non-calcium-based phosphate binders compared to placebo or no study treatment on vascular calcification.**

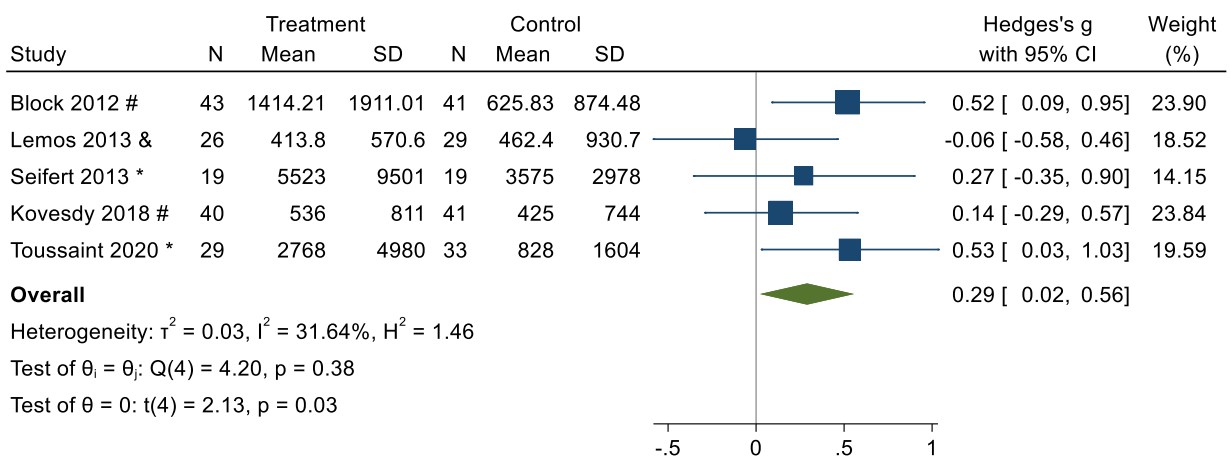

Random-effects Sidik-Jonkman model

**Supplemental Figure 9: Effect of non-calcium-based phosphate binders compared to placebo or no study treatment on mortality.**

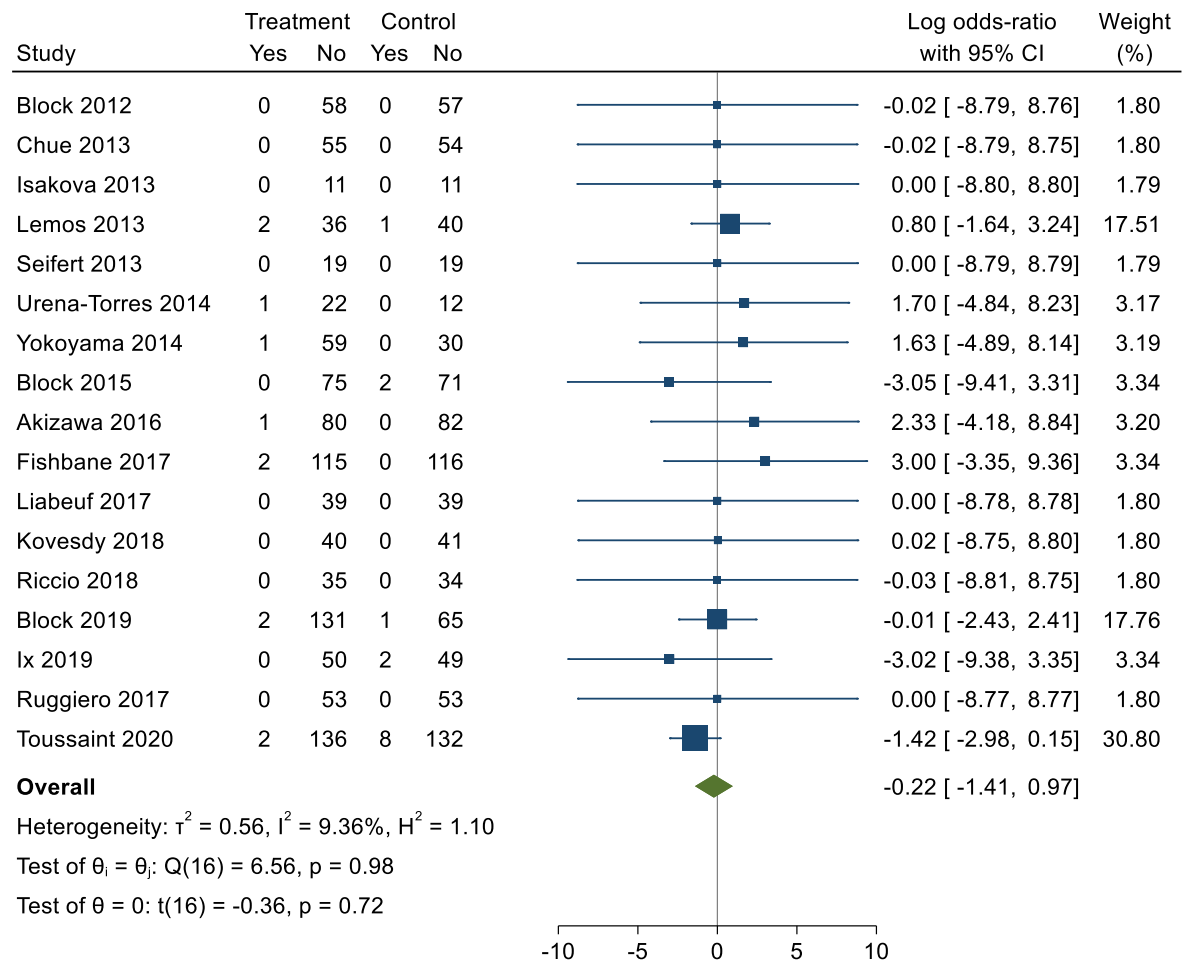

Random-effects Sidik-Jonkman model

Supplemental Figure 10: Effect of non-calcium-based phosphate binders compared to placebo or no study treatment on cardiovascular events.

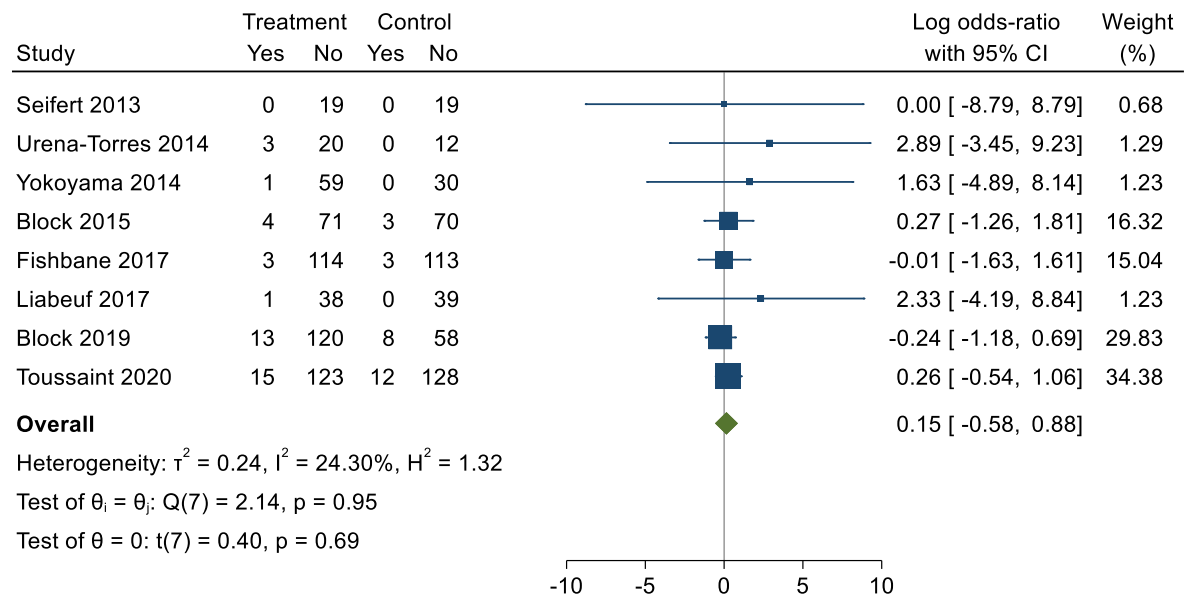

Random-effects Sidik-Jonkman model

Supplemental Figure 11a: Effect of non-calcium-based phosphate binders compared to placebo on nausea.

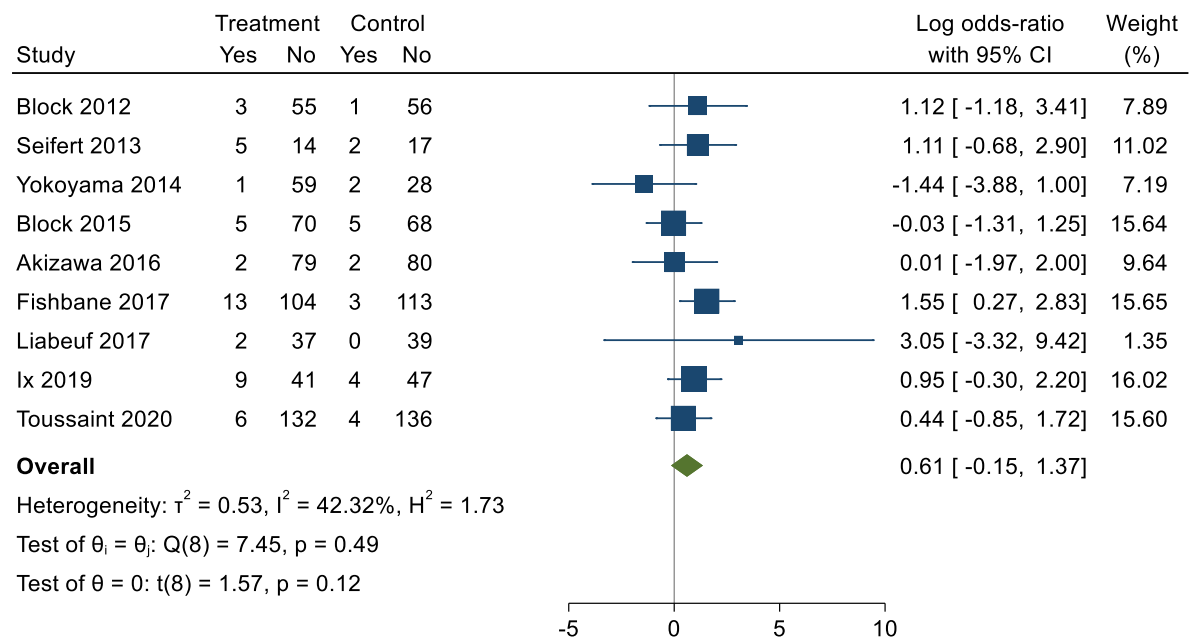

Random-effects Sidik-Jonkman model

Supplemental Figure 11b: Effect of non-calcium-based phosphate binders compared to placebo or no study treatment on nausea.

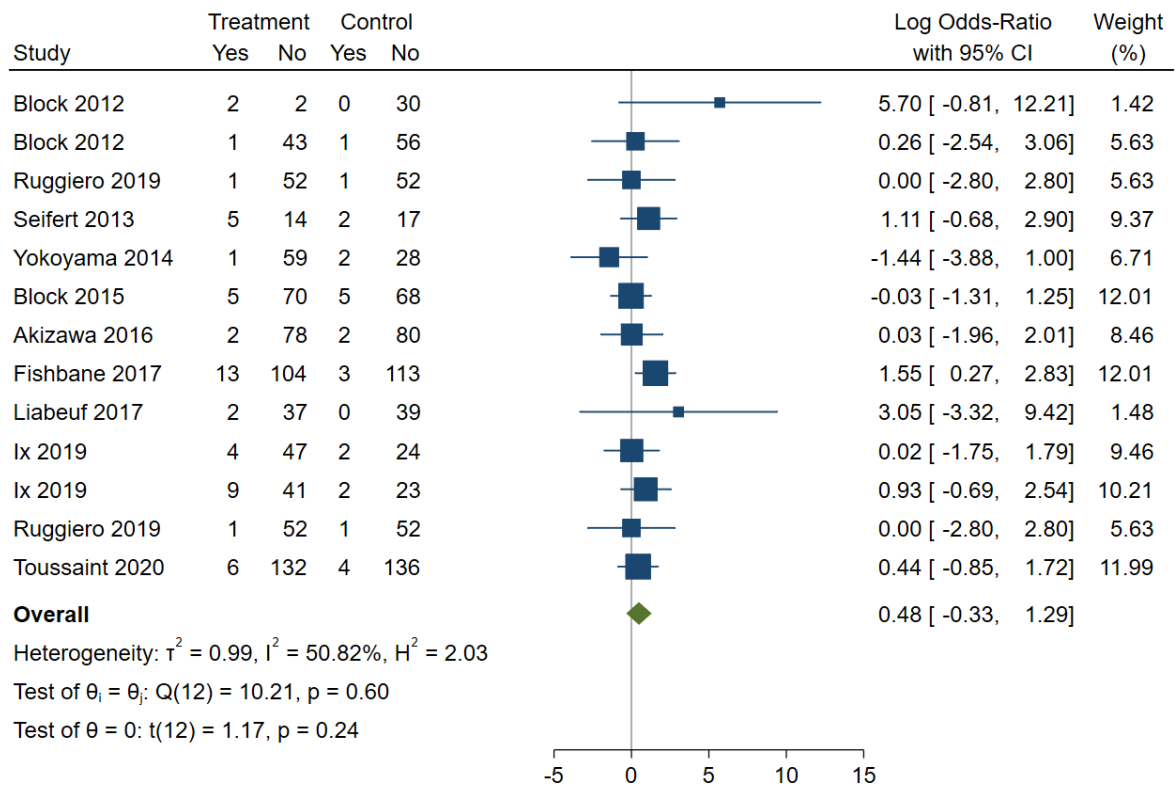

Random-effects Sidik-Jonkman model



Supplemental Figure 12: Effect of non-calcium-based phosphate binders compared to placebo or no study treatment on constipation.

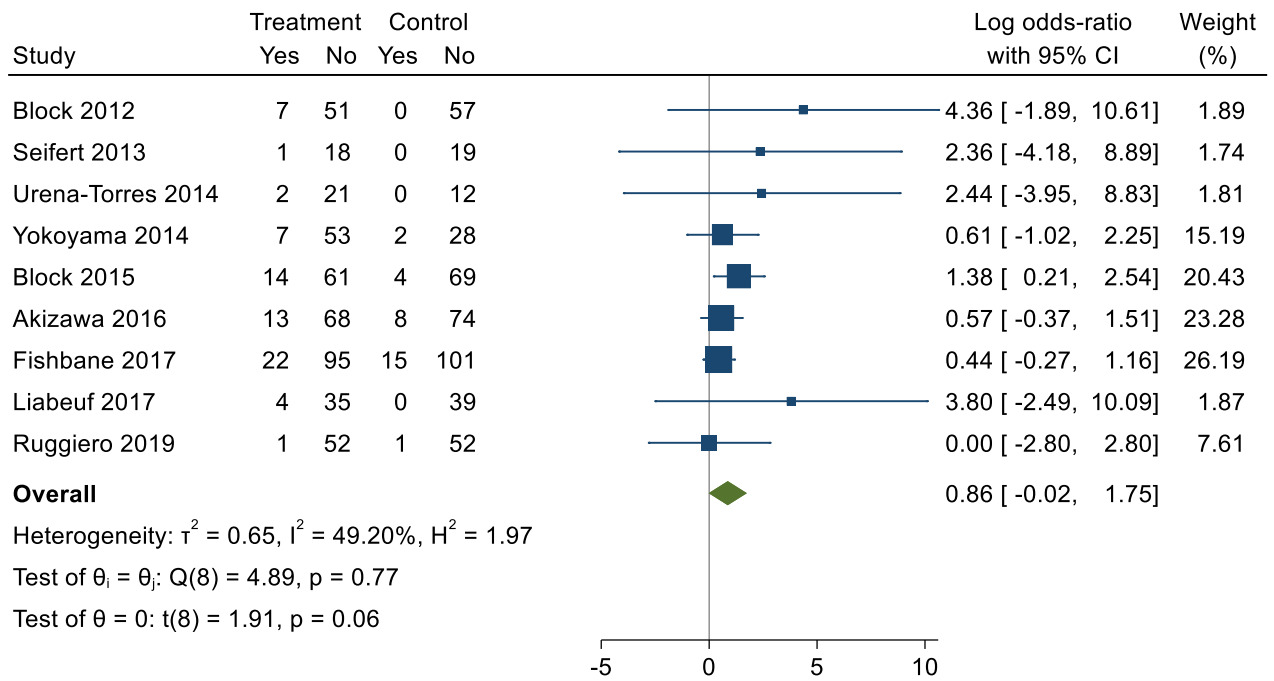

Random-effects Sidik-Jonkman model

Supplemental Figure 13a: Effect of non-calcium-based phosphate binders compared to placebo on diarrhea.

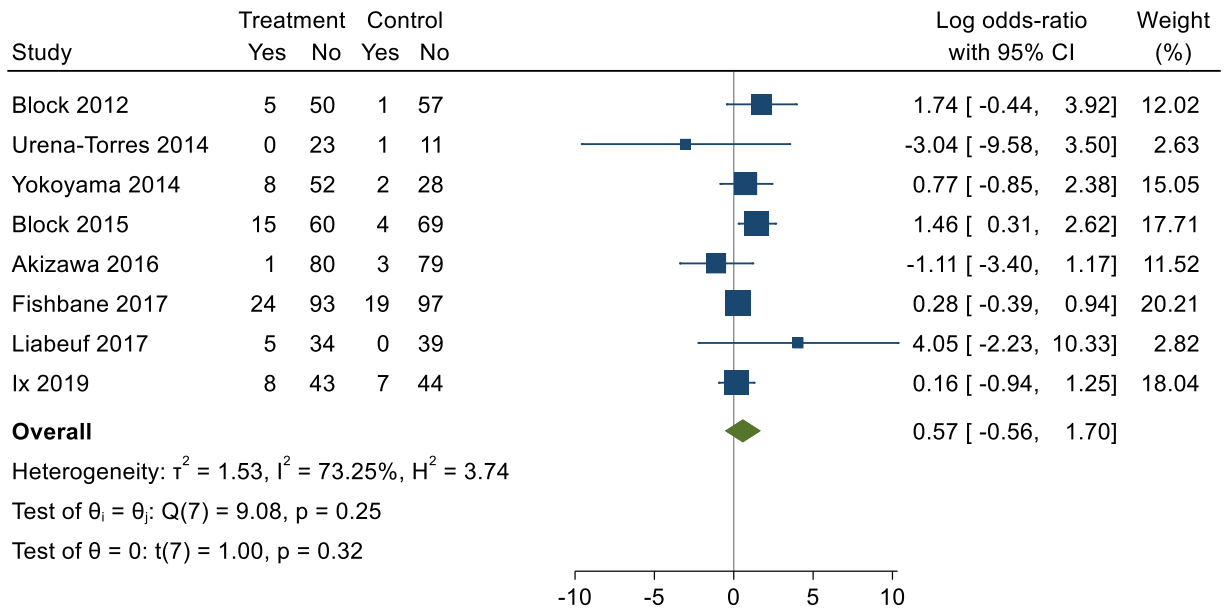

Random-effects Sidik-Jonkman model

Supplemental Figure 13b: Effect of non-calcium-based phosphate binders compared to placebo or no study treatment on diarrhea.

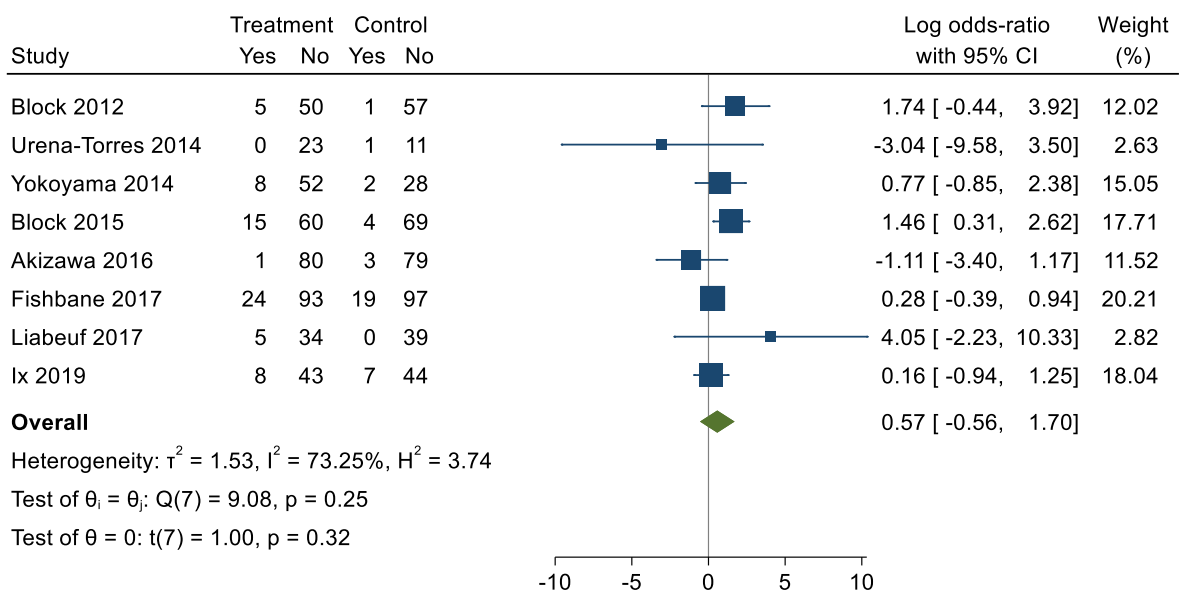

Random-effects Sidik-Jonkman model

Supplemental Figure 14: Effect of non-calcium phosphate binders compared to placebo on cessation of study medication.

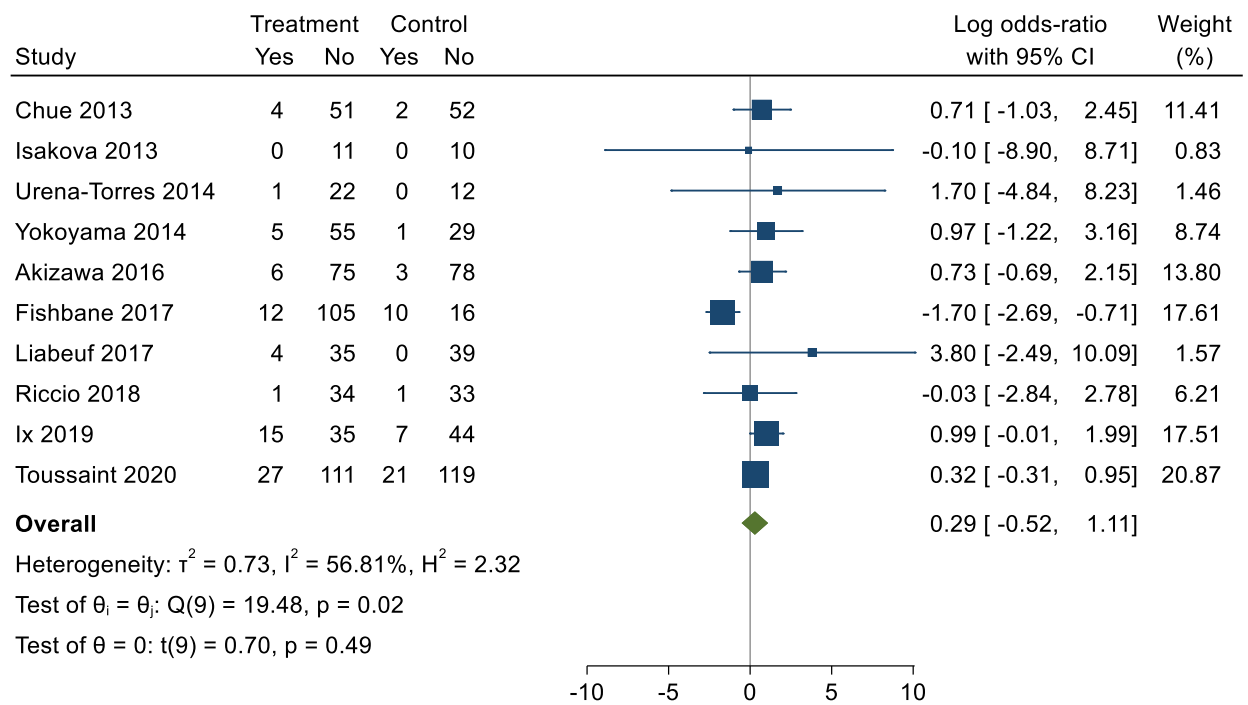

Random-effects Sidik-Jonkman model
